# Supplementary material for: Identification of HuSWEET Family in Pitaya (Hylocereus undatus) and Key Roles of HuSWEET12a and HuSWEET13d in Sugar Accumulation
Source: Int J Mol Sci. 2023 Aug 17;24(16):12882. doi: 10.3390/ijms241612882 (PMC10454816; doi:10.3390/ijms241612882)
Supplement: Supplementary file 1 [file ijms-24-12882-s001.zip › Supplementary Table 1 The primer sequences used for qRT-PCR and vector construction.xlsx]

## Sheet: Sheet1
Supptementary Table1-1 The primer sequences used for qRT-PCR
Primer names	Sequences(5'-3')
HuActin-F	TCCCGAAGAGCACCCAGTTT
HuActin-R	ATGGCATGAGGAAGGGCATA
SlActin-F	TGTCCCTATTTACGAGGGTTATGC
SlActin-R	AGTTAAATCACGACCAGCAAGAT
HuSWEET1-F	TGGTATGGGCTTCCTTTTGT
HuSWEET1-R	AAAGAGGGGAGCCATACATG
HuSWEET2-F	TTTATGCCTTGCTGAACTGC
HuSWEET2-R	GTACGGGGGTCATGAATTCT
HuSWEET4a-F	GGTGGCAGTAGAAGTAGCAT
HuSWEET4a-R	CATGGATCGAGTGGGAGAAA
HuSWEET4b-F	TGCTCTGTATCTGCTTGGAG
HuSWEET4b-R	TCCTATTCCGTTGCCAATCA
HuSWEET7a-F	GATCATCGCTGCTTCTGTTC
HuSWEET7a-R	GCATGTACTCCACGCTTTTT
HuSWEET7b-F	TGTATATCGGTTGCTGCCTT
HuSWEET7b-R	GGGCGTATAGTATCACCTGG
HuSWEET9-F	CAAAAGGGTGGCCATTGTAG
HuSWEET9-R	AGTCGCATTTAGGGTGAGAG
HuSWEET10-F	CATTGCGGTACCAAATGTGT
HuSWEET10-R	CAACTTGGAGTCATTGCTGG
HuSWEET11-F	TCCATCAGTGTTTTTGCAGC
HuSWEET11-R	AAGATGAGGCAAAGGGACAA
HuSWEET12a-F	GCCATCTTCAGTTGCATGTT
HuSWEET12a-R	GGTTGAAATCTTTGCTCGCT
HuSWEET12b-F	ACTATATCGCGATCCCCAAC
HuSWEET12b-R	GGTTGAGTTGTCGCCTTTAC
HuSWEET12c-F	TCTACGCCTTCATCAAGACC
HuSWEET12c-R	GTGAAGAAGACAATGGCACC
HuSWEET12d-F	TTTGGATGGATTTGTGTCGC
HuSWEET12d-R	CAGTTAACGTGAGGCAAAGG
HuSWEET13a-F	TAAAGGCGCTCAGAAACAGA
HuSWEET13a-R	CAGGAGCAGCTTGAGAAGTA
HuSWEET13b-F	ATATGACAAAGGCGCTCAGA
HuSWEET13b-R	TCATGGACAATTTTGCCGTC
HuSWEET13c-F	GGAGGACAATGCTACCATGA
HuSWEET13c-R	TTCACCTCGTACAAACACCA
HuSWEET13d-F	ATTCCGTCCTTCTCATCACC
HuSWEET13d-R	CTGGCAAAGGAGGACAATTG
HuSWEET13e-F	GAAGAAATCGACCGAGGGAT
HuSWEET13e-R	ACAAACACGATGAGGCAGTA
HuSWEET13f-F	AGAAATCAACGGAGGGGTTT
HuSWEET13f-R	TACGAACGCCATTGTCACTA
Supptementary Table1-2 The primer sequences used for clone
Primer names	Sequences(5'-3')
pC18-HuSWEET12a-F	GTCGACGGTATCGATAAGCTTATGTCATATGTTCAT CATTTAATGGGTCATG GGTC
pC18-HuSWEET12a-R	TTTACTCATACTAGTGGATCCAACGGCACATTGGACCAATTG
pC18-HuSWEET13d-F	GTCGACGGTATCGATAAGCTTATG TGC AGG CCA ACA TTT GTA AGA ATC
pC18-HuSWEET13d-R	TTTACTCATACTAGTGGATCCAGC GGC ACA TTG GAT CAG CT
pPZP6K90-HuSWEET12a-F	CATTCTACAACTACATCTAGAATGTCATATGTTCATCATTTAATGGG
pPZP6K90-HuSWEET12a-R	AGCTTGCATGCCAATTCTAGATCAAACGGCACATTGGACCAATTG
pPZP6K90-HuSWEET13d-F	CATTCTACAACTACATCTAGAATGTGCAGGCCAACATTTGTAAGA
pPZP6K90-HuSWEET13d-R	AGCTTGCATGCCAATTCTAGATCAAGCGGCACATTGGATCAGCT
